# Supplementary material for: Associations of the CYP7A1 Gene Polymorphisms Located in the Promoter and Enhancer Regions with the Risk of Acute Coronary Syndrome, Plasma Cholesterol, and the Incidence of Diabetes
Source: MDPI journal article supplement (doi:10.3390/biomedicines12030617), 2024-03-09
Supplement: s1 [file s1]

Supplementary Table S1. Allele and genotype frequencies of *CYP7A1* gene polymorphisms in ACS patients and healthy controls

| Polymorphic Site (rsID-number) | ACS n=1317 (n[%]) | Controls n=1046 (n[%]) | *p     |
|--------------------------------|-------------------|------------------------|--------|
| rs2081687 <i>C/T</i>           |                   |                        |        |
| Allele                         |                   |                        |        |
| <i>C</i>                       | 2163 (82.1)       | 1785 (85.4)            | 0.001  |
| <i>T</i>                       | 471 (17.8)        | 305 (14.6)             |        |
| Genotype                       |                   |                        |        |
| <i>CC</i>                      | 898 (68.2)        | 758 (72.5)             |        |
| <i>CT</i>                      | 367 (27.9)        | 269 (25.7)             |        |
| <i>TT</i>                      | 52 (4)            | 18 (1.7)               | 0.001  |
| rs9297994 <i>G/A</i>           |                   |                        |        |
| Allele                         |                   |                        |        |
| <i>A</i>                       | 2166 (82.2)       | 1796 (85.9)            | 0.0005 |
| <i>G</i>                       | 468 (17.8)        | 294 (14.0)             |        |
| Genotype                       |                   |                        |        |
| <i>AA</i>                      | 900 (68.3)        | 766 (73.3)             |        |
| <i>AG</i>                      | 366 (27.8)        | 264 (25.3)             |        |
| <i>GG</i>                      | 51 (3.9)          | 15 (1.4)               | 0.0003 |
| rs10107182 <i>C/T</i>          |                   |                        |        |
| Allele                         |                   |                        |        |
| <i>T</i>                       | 2216 (84.1)       | 1777 (85.9)            | 0.043  |
| <i>C</i>                       | 418 (15.9)        | 291 (14.0)             |        |
| Genotype                       |                   |                        |        |
| <i>TT</i>                      | 940 (71.4)        | 758 (73.3)             |        |
| <i>TC</i>                      | 336 (25.5)        | 261 (25.2)             |        |
| <i>CC</i>                      | 41 (3.1)          | 15 (1.4)               | 0.008  |
| rs10504255 <i>A/G</i>          |                   |                        |        |
| Allele                         |                   |                        |        |
| <i>A</i>                       | 2193 (83.2)       | 1798 (86.1)            | 0.005  |
| <i>G</i>                       | 441 (16.7)        | 288 (13.8)             |        |
| Genotype                       |                   |                        |        |
| <i>AA</i>                      | 920 (69.9)        | 772 (74.0)             |        |
| <i>AG</i>                      | 353 (26.8)        | 254 (24.4)             |        |
| <i>GG</i>                      | 44 (3.3)          | 17 (1.6)               | 0.009  |
| rs1457043 <i>C/T</i>           |                   |                        |        |
| Allele                         |                   |                        |        |
| <i>T</i>                       | 1982 (75.2)       | 1559 (74.8)            |        |
| <i>C</i>                       | 652 (24.7)        | 523 (25.0)             | NS     |
| Genotype                       |                   |                        |        |
| <i>TT</i>                      | 756 (57.4)        | 579 (55.6)             |        |
| <i>TC</i>                      | 470 (35.7)        | 401 (38.5)             | NS     |
| <i>CC</i>                      | 91 (6.9)          | 61 (5.9)               |        |
| rs8192870 <i>G/T</i>           |                   |                        |        |
| Allele                         |                   |                        |        |
| <i>G</i>                       | 2138 (81.1)       | 1760 (84.2)            |        |
| <i>T</i>                       | 496 (18.8)        | 328 (15.7)             | 0.005  |
| Genotype                       |                   |                        |        |
| <i>GG</i>                      | 878 (66.7)        | 736 (70.5)             |        |
| <i>GT</i>                      | 382 (39.0)        | 288 (27.6)             |        |
| <i>TT</i>                      | 57 (4.3)          | 20 (1.9)               | 0.0001 |
| rs3808607 <i>G/T</i>           |                   |                        |        |
| Allele                         |                   |                        |        |
| <i>T</i>                       | 1993 (75.6)       | 1573 (75.4)            |        |
| <i>G</i>                       | 641 (24.3)        | 511 (24.5)             | NS     |
| Genotype                       |                   |                        |        |

|           |            |            |    |
|-----------|------------|------------|----|
| <i>TT</i> | 761 (57.8) | 588 (56.4) |    |
| <i>GT</i> | 471 (35.8) | 397 (38.1) |    |
| <i>GG</i> | 85 (6.5)   | 57 (5.5)   | NS |

Data are shown as n and frequency. \*chi-square test. NS: No significant
