# Supplementary material for: Associations of the CYP7A1 Gene Polymorphisms Located in the Promoter and Enhancer Regions with the Risk of Acute Coronary Syndrome, Plasma Cholesterol, and the Incidence of Diabetes
Source: MDPI journal article supplement (doi:10.3390/biomedicines12030617), 2024-03-09
Supplement: s1 [file s1]

Table Supplementary S2. Distribution of plasma lipids concentration according to the different genotypes of the rs2081687 T/C, rs8192870 G/T, rs9297994 G/A, rs10107182 C/T and rs10504255 A/G polymorphisms in healthy control group.

|                           |                       |                    |                   |                 |
|---------------------------|-----------------------|--------------------|-------------------|-----------------|
| <i>CYP7A1</i>             | <i>rs2081687 T/C</i>  |                    |                   |                 |
| Genotypes                 | <i>CC (n=758)</i>     | <i>CT (n=269)</i>  | <i>TT (n=18)</i>  | <i>p-value*</i> |
| Parameters                |                       |                    |                   |                 |
| BMI (kg/m <sup>2</sup> )  | 27.8 [25.5-31]        | 28.2 [25.4-31]     | 26.6 [24-31]      | 0.278           |
| Blood pressure (mmHg)     |                       |                    |                   |                 |
| Systolic                  | 111 [103-122.5]       | 112.5 [104-122]    | 114 [103-120]     | 0.954           |
| Diastolic                 | 70 [64.5-76]          | 71 [65.5-76]       | 71.8 [68-78.6]    | 0.294           |
| Glucose (mg/dl)           | 90 [84-98]            | 89 [84-96]         | 85 [81-95]        | 0.378           |
| Total cholesterol (mg/dl) | 189.2 [166-210]       | 191 [169-211.5]    | 190 [180-223]     | 0.330           |
| HDL-C (mg/dl)             | 45 [36.4-55.5]        | 45 [35.8-53.4]     | 46 [38.6-51]      | 0.583           |
| LDL-C (mg/dl)             | 114.5 [95.4-132]      | 117.3 [95.5-136.5] | 119 [108.4-183]   | 0.365           |
| Triglycerides (mg/dl)     | 142.5 [108-202]       | 156.6 [103-203]    | 122.3 [101.5-183] | 0.957           |
| <i>CYP7A1</i>             | <i>rs9297944 G/A</i>  |                    |                   |                 |
| Genotypes                 | <i>AA (n=766)</i>     | <i>AG (n=264)</i>  | <i>GG (n=15)</i>  | <i>p-value</i>  |
| Parameters                |                       |                    |                   |                 |
| BMI (kg/m <sup>2</sup> )  | 27.9 [25.5-31]        | 28 [25.3-31]       | 27.2 [24-30]      | 0.721           |
| Blood pressure (mmHg)     |                       |                    |                   |                 |
| Systolic                  | 111 [103-122.5]       | 112.5 [104.5-121]  | 116 [105-121]     | 0.689           |
| Diastolic                 | 70 [64.5-76]          | 71 [65.5-76]       | 72.5 [69-78]      | 0.176           |
| Glucose (mg/dl)           | 90 [84-97]            | 90 [84-96]         | 85 [82-95]        | 0.465           |
| Total cholesterol (mg/dl) | 190 [166-210]         | 189.3 [169-211]    | 190 [182-211]     | 0.378           |
| HDL-C (mg/dl)             | 45 [36.4-55.7]        | 44.1 [35.6-53]     | 46 [38-50]        | 0.319           |
| LDL-C (mg/dl)             | 114.5 [95.2-132]      | 117 [96-136]       | 119 [109-138]     | 0.227           |
| Triglycerides (mg/dl)     | 142 [108-202]         | 157 [105-200]      | 145 [103-214]     | 0.859           |
| <i>CYP7A1</i>             | <i>rs10107182 C/T</i> |                    |                   |                 |
| Genotypes                 | <i>TT (n=758)</i>     | <i>TC (n=261)</i>  | <i>CC (n=15)</i>  | <i>p-value</i>  |
| Parameters                |                       |                    |                   |                 |
| BMI (kg/m <sup>2</sup> )  | 27.9 [25.4-30.7]      | 28 [25.3-31]       | 27.2 [24-30]      | 0.721           |
| Blood pressure (mmHg)     |                       |                    |                   |                 |
| Systolic                  | 112 [103-123]         | 112.5 [104.5-121]  | 116 [105-121]     | 0.692           |
| Diastolic                 | 70 [64.5-76]          | 70 [65.5-76]       | 72.5 [69-78]      | 0.182           |
| Glucose (mg/dl)           | 90 [84-98]            | 90 [84-96]         | 85 [82-95]        | 0.467           |
| Total cholesterol (mg/dl) | 190 [166-210]         | 189.6 [169-211]    | 190 [182-211]     | 0.380           |
| HDL-C (mg/dl)             | 45 [36.4-55.7]        | 44.1 [35.7-53]     | 46 [38-50]        | 0.321           |
| LDL-C (mg/dl)             | 114.7 [95.3-132]      | 117 [96-136]       | 119 [109-137]     | 0.300           |
| Triglycerides (mg/dl)     | 141 [108-201]         | 157 [105-199]      | 145 [103-214]     | 0.859           |
| <i>CYP7A1</i>             | <i>rs10504255 G/A</i> |                    |                   |                 |
| Genotypes                 | <i>AA (n=772)</i>     | <i>AG (n=254)</i>  | <i>GG (n=17)</i>  | <i>p-value</i>  |
| Parameters                |                       |                    |                   |                 |
| BMI (kg/m <sup>2</sup> )  | 27.9 [25.4-30.8]      | 28 [25-31]         | 27.0 [24-29]      | 0.537           |
| Blood pressure (mmHg)     |                       |                    |                   |                 |
| Systolic                  | 111 [103-122]         | 112.5 [104.5-121]  | 116 [103-120]     | 0.831           |
| Diastolic                 | 70 [64.5-76]          | 70.5 [65.5-76]     | 72.5 [69-78]      | 0.154           |
| Glucose (mg/dl)           | 90 [84-97]            | 90 [84-96]         | 85 [82-97]        | 0.509           |
| Total cholesterol (mg/dl) | 190 [166-211]         | 189 [169-211]      | 201 [186-213]     | 0.185           |
| HDL-C (mg/dl)             | 45 [36.5-56]          | 44.2 [35-53]       | 46 [38-51]        | 0.359           |
| LDL-C (mg/dl)             | 114.6 [95.3-133]      | 116 [96-136]       | 119 [110-142]     | 0.223           |
| Triglycerides (mg/dl)     | 142 [108-201]         | 156 [104-203]      | 145 [106-216]     | 0.809           |
| <i>CYP7A1</i>             | <i>rs81922870 T/G</i> |                    |                   |                 |
| Genotypes                 | <i>GG (n=736)</i>     | <i>GT (n=288)</i>  | <i>TT (n=20)</i>  | <i>p-value</i>  |
| Parameters                |                       |                    |                   |                 |
| BMI (kg/m <sup>2</sup> )  | 28 [25.5-31]          | 28 [25-31]         | 26.6 [24-31]      | 0.650           |
| Blood pressure (mmHg)     |                       |                    |                   |                 |
| Systolic                  | 111 [103-123]         | 112.3 [103.5-121]  | 116.5 [106-123]   | 0.310           |

|                           |                |               |               |       |
|---------------------------|----------------|---------------|---------------|-------|
| Diastolic                 | 70 [65-76]     | 70.5 [65-76]  | 74 [69-80]    | 0.099 |
| Glucose (mg/dl)           | 90 [84-98]     | 89 [83-96]    | 86 [83-96]    | 0.484 |
| Total cholesterol (mg/dl) | 189 [166-211]  | 189 [169-210] | 195 [176-210] | 0.499 |
| HDL-C (mg/dl)             | 45 [36.6-55]   | 45 [35-54]    | 45.5 [38-50]  | 0.330 |
| LDL-C (mg/dl)             | 114.5 [95-133] | 116 [95-135]  | 119 [106-138] | 0.285 |
| Triglycerides (mg/dl)     | 142 [108-203]  | 148 [101-198] | 160 [114-213] | 0.758 |

BMI: Body mass index, HDL: High-density lipoprotein – cholesterol, LDL: Low density lipoprotein,  $p = p\text{-value}^*$ . Data are expressed as median and interquartile interval (25th–75th). Analyzed as mean  $\pm$  SD. \* ANOVA and F-test.
